# Supplementary material for: 290 metagenome-assembled genomes from the Mediterranean Sea: a resource for marine microbiology
Source: PeerJ. 2017 Jul 10;5:e3558. doi: 10.7717/peerj.3558 (PMC5507172; doi:10.7717/peerj.3558)
Supplement: Supplemental Information 1 [file peerj-05-3558-s001.xlsx]

## Sheet: Supplemental Table 1
Genome ID (* denotes genomes with >10% cumulative redundancy, ° denotes genomes with >10% contamination, but <10% cumulative redundancy)	% Complete	%Contamination	%Strain heterogeneity	%GC	Size (Mbp)	Gene Count	No. of contigs	N50	Mean contig length (bp)	Max. contig length (bp)	16S rRNA content	CheckM Taxonomy	Ribosomal Marker Gene Phylogeny	16S rRNA ID (NCBI Accession Closest Seq on Tree) (* denotes contradiction between 16S and other phylogenetic methods)
TMED1°	100	13.64	100	43.8	2.23	2074	26	121953	85661	660692		d__Bacteria;p__Proteobacteria;c__Gammaproteobacteria
TMED2	99.13	0	0	58.5	3.35	3130	9	2086508	371827	2086508		d__Bacteria;p__Proteobacteria;c__Alphaproteobacteria	p_Proteobacteria;c_Alphaproteobacteria;g_Micavibrio
TMED3	98.42	0.56	33.33	60.7	3.3	3243	72	55392	45850	228533		d__Bacteria;p__Proteobacteria;c__Alphaproteobacteria;o__Rhodobacterales;f__Rhodobacteraceae;g__Sulfitobacter	p_Proteobacteria;c_Alphaproteobacteria;o_Rhodobacterales;f_Rhodobacteraceae;g_Sulfitobacter
TMED4	98.1	1.27	50	61.4	5.16	4981	49	161090	105377	414128	1	d__Bacteria;p__Proteobacteria;c__Alphaproteobacteria;o__Rhizobiales;f__Bradyrhizobiaceae;g__Oligotropha	p_Proteobacteria;c_Alphaproteobacteria;o_Rhizobiales;f_Bradyrhizobiaceae;g_Afipia	g_Afipia (JQ855519)
TMED5	96.86	0.42	33.33	54.8	3.55	3421	27	217677	131519	866309		d__Bacteria;p__Proteobacteria;c__Alphaproteobacteria;o__Rhodobacterales_2;f__Hyphomonadaceae	p_Proteobacteria;c_Alphaproteobacteria;o_Rhodobacterales;f_Hyphomonadaceae;
TMED6	96.7	7.69	0	28.5	1.48	1409	53	45828	27913	134995	1	d__Bacteria	p_Bacteroidetes/ChlorobiGroup;c_NovelClassA	p_Marinimicrobia
TMED7	96.09	9.23	11.67	47.8	5.4	5010	177	45221	30517	256219		d__Bacteria;p__Proteobacteria;c__Gammaproteobacteria;o__Alteromonadales;f__Alteromonadaceae
TMED8	95.85	0.5	100	45.2	3.35	3246	52	224111	64433	281254		d__Bacteria;p__Proteobacteria;c__Alphaproteobacteria;o__Rhodospirillales;f__Rhodospirillaceae	p_Proteobacteria;c_Alphaproteobacteria;o_Rhodospirillales;f_Rhodospirillaceae;
TMED9	95.39	2.5	28.57	62	3.65	2998	121	45514	30133	179243		d__Bacteria;p__Planctomycetes;c__Planctomycetia;o__Planctomycetales;f__Planctomycetaceae	p_Planctomycetes;c_Phycisphaerae;o_Phycisphaerales;f_Phycisphaeraceae;g_Phycisphaera
TMED10	95.33	5.75	60	50.5	3.76	3223	117	48078	32125	241298	1	d__Bacteria;p__Planctomycetes;c__Planctomycetia;o__Planctomycetales;f__Planctomycetaceae	p_Planctomycetes;c_Planctomycetia;o_Planctomycetales;	f_Planctomycetaceae (EU7919760)
TMED11	95.22	0	0	55.5	6.57	4738	131	90643	50122	206034	1	d__Bacteria;p__Planctomycetes;c__Planctomycetia;o__Planctomycetales;f__Planctomycetaceae	p_Planctomycetes;c_Planctomycetia;o_Planctomycetales;f_Isosphaeraceae	g_Rhodopirellula (JN428149)
TMED12	94.97	3.12	5.88	41.4	4.55	4280	165	41600	27593	218860		d__Bacteria;p__Bacteroidetes;c__Flavobacteriia;o__Flavobacteriales;f__Flavobacteriaceae	p_Bacteroidetes;c_Flavobacteriia;o_Flavobacteriales;f_Flavobacteriaceae;g_Muricauda
TMED13	94.51	4.52	62.5	29.8	1.35	1501	54	31959	24954	94287		d__Bacteria;p__Proteobacteria;c__Alphaproteobacteria;o__Rickettsiales	p_Proteobacteria;c_Alphaproteobacteria;o_Pelagibacterales;f_Pelagibacteraceae;
TMED14	94.44	4.3	20	36.1	1.72	1536	32	88906	53753	161349	1	d__Bacteria;p__Bacteroidetes;c__Flavobacteriia;o__Flavobacteriales	p_Bacteroidetes;c_Flavobacteriia;o_Flavobacteriales;f_Cryomorphaceae;g_Owenweeksia	f_Cryomorphaceae (FN433355)
TMED15	94.44	4.4	25	40.3	4.69	4006	207	29238	22653	95580	1	d__Bacteria	p_CandidateDivisionNC10;g_NovelGenusA	o_Halanaerobiales64K2 (KP005026)*
TMED16	94.41	4.32	100	38	2.46	2176	49	59190	50175	185399		d__Bacteria;p__Bacteroidetes;c__Flavobacteriia;o__Flavobacteriales;f__Cryomorphaceae	p_Bacteroidetes;c_Flavobacteriia;o_Flavobacteriales;f_Crocinitomicaceae;
TMED17	93.83	3.48	11.11	54.7	2.45	2235	15	306155	163366	705567		d__Bacteria;p__Proteobacteria;c__Alphaproteobacteria;o__Rhodobacterales_2;f__Hyphomonadaceae	p_Proteobacteria;c_Alphaproteobacteria;o_Rhodobacterales;f_Hyphomonadaceae;g_Hyphomonas
TMED18	93.58	3.51	85.71	55.1	4.19	3215	122	45418	34342	159064	1	d__Bacteria;p__Verrucomicrobia;c__Verrucomicrobiae;o__Verrucomicrobiales;f__Verrucomicrobiaceae	p_Verrucomicrobia;o_Verrucomicrobiales;f_Verrucomicrobiaceae;	g_Roseibacillus (JN986504)
TMED19	93.3	4.33	100	60.3	2.07	2353	56	50548	37051	136951		d__Bacteria;p__Cyanobacteria;c__Chroococcales;o__Chroococcales;f__Cyanobium	p_Cyanobacteria;o_Synechococcales;f_Synechococcaceae;g_Synechococcus
TMED20°	93.1	41.38	76.19	54	3.61	3998	162	27789	22267	110673		d__Bacteria;p__Cyanobacteria;c__Chroococcales;o__Chroococcales;f__Cyanobium	p_Cyanobacteria;o_Synechococcales;f_Synechococcaceae;g_Synechococcus
TMED21	92.81	3.42	100	52.9	2.33	2180	35	95612	66446	257166		d__Bacteria;p__Proteobacteria;c__Gammaproteobacteria;o__Alteromonadales_3;f__Alteromonadaceae	p_Proteobacteria;c_Gammaproteobacteria;o_Cellvibrionales;f_NovelFamilyA
TMED22	92.68	0.3	100	44.1	1.88	1849	17	168110	110656	251348		d__Bacteria;p__Proteobacteria	p_Proteobacteria;c_Betaproteobacteria;o_NovelOrderB
TMED23	92.44	0.75	50	37.8	2.57	2402	22	255024	116736	348200	1	d__Bacteria;p__Proteobacteria;c__Alphaproteobacteria;o__Rhodospirillales;f__Rhodospirillaceae		f_Rhodospirillaceae (EU799766)
TMED24	91.99	6.45	90.91	57.6	2.26	2000	41	85799	55008	171963	1	d__Bacteria;p__Planctomycetes;c__Planctomycetia;o__Planctomycetales;f__Planctomycetaceae	p_Planctomycetes;c_Phycisphaerae;o_Phycisphaerales;f_Phycisphaeraceae;g_Phycisphaera	f_PhycisphaeraceaeUrania-1B-19marinesediment (EF575009)
TMED25	91.97	4.93	100	33.2	1.42	1448	10	382379	142123	471221	1	d__Bacteria;p__Proteobacteria;c__Alphaproteobacteria;o__Rhizobiales	p_Proteobacteria;c_Alphaproteobacteria;o_Rhizobiales;f_NovelFamilyA	c_AlphaproteobacteriaOCS116 (FJ615110)
TMED26	91.52	3.49	50	55.4	3	2942	90	55246	33307	133040		d__Bacteria;p__Proteobacteria;c__Alphaproteobacteria;o__Rhodospirillales;f__Rhodospirillaceae;g__Nisaea	p_Proteobacteria;c_Alphaproteobacteria;o_Rhodospirillales;f_Rhodospirillaceae;g_CaEndolissoclinum
TMED27	91.43	2.54	50	42.6	2.5	2474	22	226054	113686	562736	1	d__Bacteria;p__Proteobacteria;c__Alphaproteobacteria	p_Proteobacteria;c_Alphaproteobacteria;g_Micavibrio	c_AlphaproteobacteriaDB1-4 (KC873417)
TMED28	91.31	5.86	42.11	36.7	1.52	1548	26	103630	58435	358688		d__Bacteria;p__Proteobacteria;c__Alphaproteobacteria;o__Rhizobiales	p_Proteobacteria;c_Alphaproteobacteria;o_Rhizobiales;f_NovelFamilyA
TMED29	90.94	4.34	50	56	1.65	1662	50	39175	33046	134370		d__Bacteria;p__Proteobacteria;c__Alphaproteobacteria;o__Rhizobiales	p_Proteobacteria;c_Alphaproteobacteria;o_Rhizobiales;f_NovelFamilyA
TMED30	90.52	9.44	100	52	3.02	2904	130	26341	23240	58790		d__Bacteria;p__Proteobacteria;c__Gammaproteobacteria	p_Proteobacteria;c_Gammaproteobacteria;o_NovelOrderA
TMED31	90.48	2	80	57.8	3.03	2973	102	38068	29662	140899		d__Bacteria;p__Proteobacteria;c__Alphaproteobacteria;o__Rhodobacterales_2;f__Hyphomonadaceae	p_Proteobacteria;c_Alphaproteobacteria;o_Rhodobacterales;f_Hyphomonadaceae;g_Hyphomonas
TMED32	90.42	9.04	17.91	38.9	3.34	3087	159	25445	21008	178327	3	d__Bacteria;p__Bacteroidetes;c__Cytophagia;o__Cytophagales	p_Bacteroidetes;c_Sphingobacteria;o_Sphingobacteriales;f_Flammeovirgaceae;	1:g_Mitochondria (GU940773)*, 2:g_Mitochondria (GU940773)*, 3:g_Marinoscillum (JN177656)
TMED33	90.19	9.27	48.78	49.5	2.18	2254	58	74357	37580	211681		d__Bacteria;p__Proteobacteria;c__Gammaproteobacteria	p_Proteobacteria;c_Gammaproteobacteria;o_Oceanospirillales;f_NovelFamilyA
TMED34°	90.12	11.63	22.92	51.3	3.55	3403	71	73480	50040	244997		d__Bacteria;p__Proteobacteria;c__Gammaproteobacteria	p_Proteobacteria;c_Gammaproteobacteria;o_NovelOrderA
TMED35	90.06	2.44	27.27	44.2	4.36	3809	103	71722	42302	225042		d__Bacteria;p__Proteobacteria;c__Gammaproteobacteria;o__Alteromonadales;f__Alteromonadaceae;g__Alteromonas
TMED36	90.06	5.88	0	37.3	1.93	1970	65	44465	29698	132097		d__Bacteria;p__Proteobacteria	p_Proteobacteria;c_Gammaproteobacteria;o_NovelOrderB
TMED37	89.54	8.99	0	39.5	5.19	5431	293	19826	17700	123197		d__Bacteria;p__Proteobacteria;c__Alphaproteobacteria;o__Rhodospirillales;f__Rhodospirillaceae;g__Nisaea	p_Proteobacteria;c_Alphaproteobacteria;o_Rhodospirillales;f_Rhodospirillaceae;g_CaEndolissoclinum
TMED38°	89.26	12.35	51.28	40.2	2.54	2564	80	48568	31790	112431		d__Bacteria;p__Proteobacteria;c__Alphaproteobacteria;o__Rhodobacterales;f__Rhodobacteraceae	p_Proteobacteria;c_Alphaproteobacteria;o_Rhodobacterales;f_Rhodobacteraceae;g_NovelGenusA
TMED39	89.07	0.55	100	35.7	1.6	1446	8	392182	200141	414201	1	d__Bacteria;p__Bacteroidetes		f_SphingobacterialesNS11-12 (KC000876)
TMED40	87.8	4.05	62.5	47.6	2.49	2078	66	53528	37801	184752		d__Bacteria;p__Verrucomicrobia;c__Opitutae;o__Opitutales	p_Verrucomicrobia;c_NovelClassA
TMED41	87.8	6.06	70.59	35.8	1.92	1897	79	33141	24351	92068		d__Bacteria;p__Proteobacteria;c__Betaproteobacteria;o__Burkholderiales	p_Proteobacteria;c_Betaproteobacteria;o_NovelOrderA
TMED42	87.68	5.68	57.14	39.6	2.09	1901	45	75312	46379	193012		d__Bacteria;p__Bacteroidetes;c__Flavobacteriia;o__Flavobacteriales;f__Flavobacteriaceae	p_Bacteroidetes;c_Flavobacteriia;o_Flavobacteriales;f_Flavobacteriaceae;g_NovelGenusA
TMED43	87.34	1.85	76.92	41.1	3.99	3697	187	24703	21362	92634		d__Bacteria;p__Proteobacteria;c__Gammaproteobacteria;o__Alteromonadales_2;f__Pseudoalteromonadaceae;g__Pseudoalteromonas
TMED44	86.49	3.04	57.14	42	2.35	2146	132	20086	17838	64280		d__Bacteria;p__Verrucomicrobia;c__Opitutae;o__Opitutales	p_Verrucomicrobia;c_NovelClassA
TMED45	86.47	2.42	16.67	53.5	2.39	2198	41	82804	58175	303591		d__Bacteria;p__Bacteroidetes;c__Flavobacteriia;o__Flavobacteriales	p_Bacteroidetes;c_Flavobacteriia;o_Flavobacteriales;f_Crocinitomicaceae;
TMED46	86.26	7.69	50	35.9	2.05	1831	31	85174	66076	152978		d__Bacteria	p_Bacteroidetes/ChlorobiGroup;c_NovelClassA
TMED47	86.02	6.35	29.63	42	1.78	1733	54	61801	32940	130129		d__Bacteria;p__Proteobacteria;c__Gammaproteobacteria	p_Proteobacteria;c_Gammaproteobacteria;o_Cellvibrionales;f_NovelFamilyB
TMED48	86.02	2.56	50	38.6	1.77	1678	57	39249	31018	93585		d__Bacteria;p__Bacteroidetes;c__Flavobacteriia;o__Flavobacteriales;f__Flavobacteriaceae	p_Bacteroidetes;c_Flavobacteriia;o_Flavobacteriales;f_Flavobacteriaceae;g_NovelGenusA
TMED49	85.93	6.36	40	42.3	2.09	2002	85	36818	24633	72985		d__Bacteria;p__Proteobacteria;c__Gammaproteobacteria	p_Proteobacteria;c_Gammaproteobacteria;o_Cellvibrionales;f_NovelFamilyB
TMED50	85.88	9.44	60	55	3.71	3824	36	139447	103174	316472		d__Bacteria;p__Proteobacteria;c__Gammaproteobacteria	p_Proteobacteria;c_Gammaproteobacteria;o_NovelOrderA
TMED51°	85.86	61.72	100	52.8	4.34	4369	109	87968	39845	286105		d__Bacteria;p__Proteobacteria
TMED52	85.61	8.6	14.71	48	2.93	2969	171	19179	17116	102758		d__Bacteria;p__Proteobacteria;c__Alphaproteobacteria;o__Rhodospirillales;f__Rhodospirillaceae	p_Proteobacteria;c_Alphaproteobacteria;g_CaPuniceispirillum
TMED53	85.23	1.61	0	52.2	2.99	2378	126	31092	23731	152552	1	d__Bacteria	p_Planctomycetes;	p_PlanctomycetesPla3 (KF786393)
TMED54	85.02	4.28	58.82	28.8	2.1	2231	87	32125	24146	79895		d__Bacteria;p__Proteobacteria;c__Alphaproteobacteria;o__Rhodospirillales;f__Rhodospirillaceae	p_Proteobacteria;c_Alphaproteobacteria;o_NovelOrderA
TMED55°	84.91	14.22	43.64	43.6	3.46	3390	123	35810	28166	133513		d__Bacteria;p__Proteobacteria;c__Alphaproteobacteria;o__Rhodospirillales;f__Rhodospirillaceae;g__Nisaea	p_Proteobacteria;c_Alphaproteobacteria;o_Rhodospirillales;f_Rhodospirillaceae;g_CaEndolissoclinum
TMED56	84.8	5.07	81.82	41.1	2.48	2255	148	17665	16754	66778		d__Bacteria;p__Verrucomicrobia;c__Opitutae;o__Opitutales	p_Verrucomicrobia;c_NovelClassA
TMED57°	84.48	13.04	70.83	54.9	2.11	2112	109	22324	19341	79279		d__Bacteria;p__Proteobacteria;c__Gammaproteobacteria
TMED58	84.35	1.22	0	32	1.28	1340	26	191080	49283	356816	1	d__Bacteria	p_Proteobacteria;c_Deltaproteobacteria;o_NovelOrderA	f_DeltaproteobacteriaSh765B-TzT-29 (EU68594)
TMED59	84.27	5.31	67.86	49.1	2.23	2318	102	33030	21902	144762		d__Bacteria;p__Proteobacteria;c__Gammaproteobacteria	p_Proteobacteria;c_Gammaproteobacteria;o_Oceanospirillales;f_NovelFamilyA
TMED60	84.08	3.04	37.5	43.3	2.13	1773	67	42128	31773	142093		d__Bacteria;p__Verrucomicrobia;c__Opitutae;o__Opitutales	p_Verrucomicrobia;c_NovelClassA
TMED61	83.99	5.49	9.09	53.2	2.6	2570	96	31743	27110	209827		d__Bacteria;p__Proteobacteria	p_Proteobacteria;
TMED62	83.52	3.3	0	28.1	1.59	1693	35	68487	45511	120258		d__Bacteria;p__Proteobacteria;c__Alphaproteobacteria;o__Rickettsiales	p_Proteobacteria;c_Alphaproteobacteria;o_NovelOrderB
TMED63	83.33	8.57	40.74	55.7	2.96	3037	187	16368	15813	89064		d__Bacteria;p__Proteobacteria;c__Alphaproteobacteria;o__Rhodospirillales;f__Rhodospirillaceae	p_Proteobacteria;c_Alphaproteobacteria;o_Rhodospirillales;f_Rhodospirillaceae;
TMED64	83.13	3.61	25	31.1	1.79	2016	86	30910	20785	82324		d__Bacteria;p__Proteobacteria;c__Alphaproteobacteria;o__Rickettsiales;f__Pelagibacteraceae	p_Proteobacteria;c_Alphaproteobacteria;o_Pelagibacterales;f_Pelagibacteraceae;g_Pelagibacter
TMED65	82.97	2.2	0	30	1.69	1762	36	46424	46940	175410		d__Bacteria;p__Proteobacteria;c__Alphaproteobacteria;o__Rickettsiales	p_Proteobacteria;c_Alphaproteobacteria;o_Pelagibacterales;f_Pelagibacteraceae;
TMED66°	82.76	19.89	53.33	54	2.15	2433	105	24191	20508	108583	1	d__Bacteria;p__Cyanobacteria;c__Chroococcales;o__Chroococcales;f__Cyanobium	p_Cyanobacteria;o_Synechococcales;f_Synechococcaceae;g_Synechococcus	g_Mitochondria (GU940773)*
TMED67	82.76	6.57	0	40.2	2.92	2471	134	26870	21776	95293	1	d__Bacteria;p__Verrucomicrobia;c__Verrucomicrobiae;o__Verrucomicrobiales	p_Verrucomicrobia;c_Opitutae;	g_Chloroplast (JX945378)*
TMED68	82.35	4.04	0	31.2	1.76	1668	29	128304	60568	224293		d__Bacteria;p__Bacteroidetes;c__Flavobacteriia;o__Flavobacteriales	p_Bacteroidetes;c_Flavobacteriia;o_Flavobacteriales;f_Flavobacteriaceae;g_NovelGenusA
TMED69	82.22	1.83	20	38.6	1.97	2047	10	233642	197361	459910		d__Bacteria;p__Proteobacteria	p_Proteobacteria;c_Gammaproteobacteria;o_Methylococcales;f_Methylococcaceae;g_NovelGenusA
TMED70	82.18	5.94	100	31.1	1.33	1362	47	40290	28280	128636	1	d__Bacteria;p__Chloroflexi;c__Dehalococcoidetes	p_NovelDivisionA;	p_ChloroflexiSAR202 (AY907820)
TMED71	81.86	7.09	7.14	50	2.99	2803	184	17384	16243	49465		d__Bacteria;p__Verrucomicrobia;c__Opitutae;o__Opitutales
TMED72	81.24	10	30	59.3	4.38	3840	215	25604	20379	126143		d__Bacteria;p__Proteobacteria;c__Deltaproteobacteria
TMED73	81.08	8.31	61.11	50.2	1.68	1582	41	62641	40922	121739		d__Bacteria;p__Verrucomicrobia;c__Opitutae;o__Opitutales	p_Verrucomicrobia;c_Opitutae;o_Opitutales;f_Puniceicoccaceae;g_Coraliomargarita
TMED74	80.85	1.25	50	53.5	3.6	3606	105	49593	34330	147743		d__Bacteria;p__Proteobacteria;c__Alphaproteobacteria;o__Rhizobiales;f__Hyphomicrobiaceae	p_Proteobacteria;c_Alphaproteobacteria;o_Rhizobiales;f_Hyphomicrobiaceae
TMED75	80.62	1.7	50	58.7	2.98	2522	125	29467	23801	88461		d__Bacteria;p__Planctomycetes;c__Planctomycetia;o__Planctomycetales;f__Planctomycetaceae
TMED76	80.56	2.72	88.89	39.2	3.01	2401	90	43198	33461	162160	1	d__Bacteria;p__Verrucomicrobia;c__Verrucomicrobiae;o__Verrucomicrobiales;f__Verrucomicrobiaceae	p_Verrucomicrobia;o_Verrucomicrobiales;f_Verrucomicrobiaceae;	p_Verrucomicrobia
TMED77	80.34	1.28	0	42.9	1.39	1366	16	149580	87123	367565		d__Bacteria;p__Actinobacteria;c__Actinobacteria	p_Actinobacteria;c_Actinobacteria;o_Acidimicrobiales;f_Acidimicrobiaceae;
TMED78	80.24	0.53	0	34.5	1.57	1603	28	102911	56210	394487		d__Bacteria;p__Proteobacteria;c__Gammaproteobacteria	p_Proteobacteria;c_Gammaproteobacteria;o_NovelOrderC
TMED79	80.03	1.48	40	52.1	2.21	2134	117	21766	18884	70341		d__Bacteria;p__Proteobacteria;c__Gammaproteobacteria;o__Alteromonadales_3;f__Alteromonadaceae	p_Proteobacteria;c_Gammaproteobacteria;o_Cellvibrionales;f_NovelFamilyA
TMED80	79.67	4.4	50	33.1	1.79	1638	55	49093	32483	168743		d__Bacteria	p_Bacteroidetes/ChlorobiGroup;c_NovelClassA
TMED81	79.64	4.46	29.17	42.5	1.67	1691	71	30407	23460	88334		d__Bacteria;p__Bacteroidetes;c__Flavobacteriia;o__Flavobacteriales;f__Flavobacteriaceae	p_Bacteroidetes;c_Flavobacteriia;o_Flavobacteriales;f_Flavobacteriaceae;g_NovelGenusA
TMED82	79.51	0	0	37.5	1.58	1571	7	479608	225694	529286		d__Bacteria;p__Proteobacteria;c__Betaproteobacteria	p_Proteobacteria;c_Betaproteobacteria;o_NovelOrderA
TMED83°	79.46	15.81	81.03	55.2	1.79	1782	60	46428	29872	114577		d__Bacteria;p__Proteobacteria;c__Alphaproteobacteria;o__Rhizobiales	p_Proteobacteria;c_Alphaproteobacteria;o_Rhizobiales;f_NovelFamilyA
TMED84	79.31	8.62	5.56	30.4	1.11	1070	39	32126	28566	119816		d__Bacteria;p__Bacteroidetes;c__Flavobacteriia;o__Flavobacteriales	p_Bacteroidetes;c_Flavobacteriia;o_Flavobacteriales;f_NovelFamilyA
TMED85	79.25	9.87	40	39	2.04	1714	37	110700	55127	207417		d__Archaea;p__Euryarchaeota	p_EuryarchaeotaMarineGroupIII;
TMED86	79.03	0.82	0	54	3.46	2808	197	20231	17553	71126		d__Bacteria;p__Verrucomicrobia;c__Verrucomicrobiae;o__Verrucomicrobiales;f__Verrucomicrobiaceae	p_Verrucomicrobia;o_Verrucomicrobiales;f_Verrucomicrobiaceae;
TMED87	78.89	8.21	9.52	35.4	2.08	2020	114	21277	18250	83002		d__Bacteria;p__Proteobacteria;c__Alphaproteobacteria;o__Rhodospirillales;f__Rhodospirillaceae	p_Proteobacteria;c_Alphaproteobacteria
TMED88	78.86	2.24	5	56.1	5.19	4531	267	24512	19432	77252	1	d__Bacteria;p__Proteobacteria;c__Deltaproteobacteria	p_NovelDivisionB;	g_Mitochondria (HQ418451)*
TMED89	78.7	10	53.33	58.6	2.79	2569	195	14984	14312	64531		d__Bacteria;p__Proteobacteria;c__Alphaproteobacteria;o__Rhodospirillales;f__Rhodospirillaceae
TMED90	78.26	2.45	100	59.8	1.78	1996	87	24701	20471	61611		d__Bacteria;p__Cyanobacteria;c__Chroococcales;o__Chroococcales;f__Cyanobium	p_Cyanobacteria;o_Synechococcales;f_Synechococcaceae;g_Synechococcus
TMED91	77.8	2.1	73.33	50.9	1.15	1227	55	23643	20828	71869		d__Bacteria;p__Proteobacteria;c__Gammaproteobacteria	p_Proteobacteria;c_Gammaproteobacteria;o_Oceanospirillales;f_NovelFamilyA
TMED92	77.52	9.07	43.33	53.1	2.58	2586	154	17997	16743	66579		d__Bacteria;p__Proteobacteria;c__Gammaproteobacteria	p_Proteobacteria;c_Gammaproteobacteria;o_NovelOrderA
TMED93	77.47	8.63	71.43	29.5	1.57	1735	82	25188	19174	61971		d__Bacteria;p__Proteobacteria;c__Alphaproteobacteria;o__Rickettsiales	p_Proteobacteria;c_Alphaproteobacteria;o_NovelOrderB
TMED94	77.3	9.06	14.71	31.4	1.51	1539	49	40279	30823	144675		d__Bacteria;p__Proteobacteria;c__Alphaproteobacteria;o__Rhizobiales	p_Proteobacteria;c_Alphaproteobacteria;o_Rhizobiales;f_NovelFamilyA
TMED95	77.02	9.17	2.7	49.5	2.87	2804	41	87278	69991	219833		d__Bacteria;p__Proteobacteria;c__Gammaproteobacteria	p_Proteobacteria;c_Gammaproteobacteria;o_NovelOrderA
TMED96	76.84	2.21	0	30.2	1.27	1244	23	50331	55386	132779		d__Bacteria;p__Bacteroidetes;c__Flavobacteriia;o__Flavobacteriales	p_Bacteroidetes;c_Flavobacteriia;o_Flavobacteriales;f_Flavobacteriaceae;g_NovelGenusA
TMED97	76.74	0.8	0	35.6	1.63	1528	44	60625	37105	148370		d__Archaea;p__Euryarchaeota	p_EuryarchaeotaMarineGroupII;
TMED98	76.57	1.64	100	59.4	1.03	1073	56	21125	18434	67273		d__Bacteria;p__Actinobacteria;c__Actinobacteria;o__Actinomycetales;f__Microbacteriaceae	p_Actinobacteria;c_Actinobacteria;o_Actinomycetales;f_Cellulomonadaceae
TMED99	76.53	3.24	33.33	45.1	2.09	1770	76	38263	27442	105134		d__Archaea;p__Euryarchaeota	p_EuryarchaeotaMarineGroupII;
TMED100	76	2.37	80	34.2	1.47	1454	48	34899	30620	109471		d__Bacteria;p__Proteobacteria;c__Betaproteobacteria	p_Proteobacteria;c_Betaproteobacteria;o_NovelOrderA
TMED101	75.8	9.58	77.59	52.8	1.96	1876	97	24722	20212	80249		d__Bacteria;p__Proteobacteria;c__Gammaproteobacteria;o__Alteromonadales_3;f__Alteromonadaceae
TMED102	75.67	5.24	77.78	55.4	2.65	2259	183	15592	14503	52531		d__Bacteria;p__Verrucomicrobia;c__Verrucomicrobiae;o__Verrucomicrobiales	p_Verrucomicrobia;c_Opitutae;
TMED103	75.33	6.13	10	46.8	2	1689	41	74653	48827	171802		d__Archaea;p__Euryarchaeota	p_EuryarchaeotaMarineGroupII;
TMED104	75.25	9.2	69.57	37.2	1.69	1818	45	51696	37605	180896		d__Bacteria;p__Proteobacteria;c__Gammaproteobacteria
TMED105	74.86	7.92	0	47.3	1.24	1136	12	640142	103412	640142	1	d__Bacteria;p__Bacteroidetes	p_Bacteroidetes;c_Bacteroidetes;o_Incertaesedis;f_Rhodothermaceae	o_CytophagiaOrderIII (KF234354)
TMED106*	74.81	25.9	4.35	28	0.98	1046	28	36160	34877	64070		d__Bacteria;p__Proteobacteria;c__Alphaproteobacteria;o__Rickettsiales;f__Pelagibacteraceae	p_Proteobacteria;c_Alphaproteobacteria;o_Pelagibacterales;f_Pelagibacteraceae;g_Pelagibacter
TMED107	74.35	1.25	66.67	52.5	2.2	2038	114	23080	19307	84473		d__Bacteria;p__Proteobacteria;c__Gammaproteobacteria	p_Proteobacteria;c_Gammaproteobacteria;o_NovelOrderA
TMED108	74.18	1.1	0	35	1.31	1279	35	63596	37543	135964		d__Bacteria
TMED109	74.1	2.15	100	29.6	1.35	1412	35	40746	38711	115186		d__Bacteria;p__Proteobacteria;c__Alphaproteobacteria	p_Proteobacteria;c_Alphaproteobacteria;o_NovelOrderB
TMED110	73.96	3.33	46.15	45.8	1.23	1231	68	20057	18088	41217		d__Bacteria;p__Proteobacteria;c__Alphaproteobacteria;o__Rhizobiales
TMED111	73.38	4.44	3.85	39.2	2.29	2376	109	27196	20984	116440		d__Bacteria;p__Proteobacteria;c__Alphaproteobacteria;o__Rhodobacterales;f__Rhodobacteraceae	p_Proteobacteria;c_Alphaproteobacteria;o_Rhodobacterales;f_Rhodobacteraceae;g_NovelGenusA
TMED112	73.32	0.38	50	33.6	1.01	1069	22	58884	46122	221949		d__Bacteria;p__Proteobacteria;c__Gammaproteobacteria	p_Proteobacteria;c_Gammaproteobacteria;o_NovelOrderE
TMED113	72.89	0.54	100	29.9	1.31	1145	70	20366	18728	83862		d__Bacteria;p__Bacteroidetes;c__Flavobacteriia;o__Flavobacteriales	p_Bacteroidetes;c_Flavobacteriia;o_Flavobacteriales;f_NovelFamilyA
TMED114	72.85	1.16	100	61.1	1.65	1382	8	384968	206402	476618	1	d__Bacteria;p__Bacteroidetes;c__Flavobacteriia;o__Flavobacteriales	p_Bacteroidetes;c_Flavobacteriia;o_Flavobacteriales;f_Crocinitomicaceae;	o_FlavobacterialesNS9marinegroup (JN986299)
TMED115	72.76	0	0	62.2	1.41	1437	18	131702	78609	182177	1	d__Bacteria;p__Actinobacteria;c__Actinobacteria;o__Actinomycetales	p_Actinobacteria;c_Actinobacteria;o_Actinomycetales;	c_ActinobacteriaPeM15 (KC000309)
TMED116	72.39	5.39	66.67	30	1.23	1221	33	61966	37202	117449		d__Bacteria;p__Bacteroidetes;c__Flavobacteriia;o__Flavobacteriales	p_Bacteroidetes;c_Flavobacteriia;o_Flavobacteriales;f_Flavobacteriaceae;g_NovelGenusA
TMED117°	72.34	12.8	28.57	42.7	2.1	1929	137	17690	15310	66184		d__Archaea;p__Euryarchaeota
TMED118	72.29	9.64	0	30.6	1.56	1562	13	137811	120271	199193		d__Bacteria;p__Proteobacteria;c__Alphaproteobacteria;o__Rickettsiales;f__Pelagibacteraceae	p_Proteobacteria;c_Alphaproteobacteria;o_Pelagibacterales;f_Pelagibacteraceae;g_Pelagibacter
TMED119	71.59	5.53	30.56	46.6	1.4	1429	15	131245	93276	349410		d__Bacteria;p__Proteobacteria;c__Gammaproteobacteria	p_Proteobacteria;c_Gammaproteobacteria;o_NovelOrderD
TMED120	71.44	4.38	0	40.1	1.45	1392	26	75942	55768	220421		d__Bacteria;p__Bacteroidetes;c__Flavobacteriia;o__Flavobacteriales;f__Flavobacteriaceae	p_Bacteroidetes;c_Flavobacteriia;o_Flavobacteriales;f_Flavobacteriaceae;g_NovelGenusA
TMED121	71.34	7.85	19.23	33.9	1.62	1468	40	40427	40483	111628		d__Bacteria;p__Bacteroidetes;c__Flavobacteriia;o__Flavobacteriales;f__Flavobacteriaceae	p_Bacteroidetes;c_Flavobacteriia;o_Flavobacteriales;f_Flavobacteriaceae;g_NovelGenusA
TMED122	71.21	4.34	0	51.9	2.29	2368	160	14730	14300	71117		d__Bacteria;p__Proteobacteria;c__Gammaproteobacteria;o__Alteromonadales_3;f__Alteromonadaceae	p_Proteobacteria;c_Gammaproteobacteria;o_Cellvibrionales;f_NovelFamilyA
TMED123	70.97	3.49	0	38.5	2.14	2077	99	36318	21567	222721	1	d__Bacteria;p__Bacteroidetes;c__Flavobacteriia;o__Flavobacteriales	p_Bacteroidetes;c_Flavobacteriia;o_Flavobacteriales;f_NovelFamilyA	o_Flavobacteriales
TMED124*	70.84	38.68	10.42	29.7	1.19	1312	43	27980	27649	36342		d__Bacteria;p__Proteobacteria;c__Alphaproteobacteria;o__Rickettsiales;f__Pelagibacteraceae
TMED125*	70.69	18.97	3.85	55.2	2.21	2126	9	276707	245816	365601		d__Bacteria;p__Proteobacteria;c__Alphaproteobacteria;o__Rhodobacterales_2;f__Hyphomonadaceae
TMED126	70.31	0.84	100	30.2	0.82	877	7	152839	117355	226402		d__Bacteria;p__Proteobacteria	p_Proteobacteria;c_Deltaproteobacteria;o_NovelOrderA
TMED127	70.18	0	0	30.1	1.2	1309	12	165270	100166	252503		d__Bacteria;p__Proteobacteria;c__Alphaproteobacteria;o__Rickettsiales
TMED128	69.68	0	0	28.5	0.74	780	34	27908	21686	70087		d__Bacteria;p__Proteobacteria;c__Alphaproteobacteria;o__Rickettsiales;f__Pelagibacteraceae	p_Proteobacteria;c_Alphaproteobacteria;o_Pelagibacterales;f_Pelagibacteraceae;g_Pelagibacter
TMED129	69.33	0	0	36.8	1.4	1367	75	21903	18701	73220		d__Archaea;p__Euryarchaeota	p_EuryarchaeotaMarineGroupII;
TMED130	69.23	2.14	0	44.3	1.46	1441	8	240478	182289	280483		d__Bacteria;p__Actinobacteria;c__Actinobacteria	p_Actinobacteria;c_Actinobacteria;o_Acidimicrobiales;f_Acidimicrobiaceae;
TMED131	69.1	0	0	34.6	1.42	1561	112	12269	12665	41299		d__Bacteria;p__Proteobacteria;c__Alphaproteobacteria;o__Rickettsiales
TMED132°	69.07	10.52	26.32	40.6	1.82	1650	66	41295	27513	92737		d__Archaea;p__Euryarchaeota	p_EuryarchaeotaMarineGroupII;
TMED133	69.06	1.67	0	43.4	1.52	1451	12	138982	126505	236416		d__Bacteria;p__Proteobacteria;c__Gammaproteobacteria	p_Proteobacteria;c_Gammaproteobacteria;o_NovelOrderA
TMED134°	68.97	85.58	93.93	55.9	3.49	3285	79	84938	44143	203382		d__Bacteria;p__Proteobacteria;c__Gammaproteobacteria
TMED135	68.82	7.97	15.38	29.9	1.66	1530	67	33518	24724	60949		d__Bacteria;p__Bacteroidetes;c__Flavobacteriia;o__Flavobacteriales	p_Bacteroidetes;c_Flavobacteriia;o_Flavobacteriales;f_Crocinitomicaceae;
TMED136	68.52	0	0	29	0.89	974	21	49855	42492	145779		d__Bacteria;p__Proteobacteria;c__Alphaproteobacteria;o__Rickettsiales;f__Pelagibacteraceae
TMED137	68.23	0	0	49.1	2.58	2037	37	100453	69653	178610		d__Bacteria;p__Verrucomicrobia;c__Verrucomicrobiae;o__Verrucomicrobiales;f__Verrucomicrobiaceae	p_Verrucomicrobia;o_Verrucomicrobiales;f_Verrucomicrobiaceae;
TMED138	67.75	2.16	100	49.2	2.01	1652	47	72450	42850	114584	1	d__Bacteria;p__Planctomycetes;c__Planctomycetia;o__Planctomycetales;f__Planctomycetaceae	p_Planctomycetes;c_Planctomycetia;o_Planctomycetales;	f__Planctomycetaceae (FN822205)
TMED139	67.72	2.86	85.71	43.8	1.65	1548	60	32535	27423	59544		d__Bacteria;p__Proteobacteria;c__Gammaproteobacteria	p_Proteobacteria;c_Gammaproteobacteria;o_NovelOrderA
TMED140	67.56	0.43	100	64	1.74	1532	50	49586	34861	138587		d__Bacteria;p__Proteobacteria;c__Alphaproteobacteria;o__Rhodospirillales;f__Rhodospirillaceae
TMED141	67.53	4	0	53.7	2.36	2108	64	60330	36951	216904		d__Archaea;p__Euryarchaeota	p_EuryarchaeotaMarineGroupII;
TMED142	67.26	3.57	25	30.9	0.99	1117	81	12576	12215	31592		d__Bacteria;p__Proteobacteria;c__Alphaproteobacteria;o__Rickettsiales;f__Pelagibacteraceae	p_Proteobacteria;c_Alphaproteobacteria;o_Pelagibacterales;f_Pelagibacteraceae;g_Pelagibacter
TMED143	66.97	0.43	0	53.2	1.36	1368	20	118918	68110	216345		d__Bacteria;p__Proteobacteria;c__Alphaproteobacteria;o__Rhizobiales	p_Proteobacteria;c_Alphaproteobacteria;o_Rhizobiales;f_NovelFamilyA
TMED144	66.97	7.69	33.33	33	1.4	1301	44	76386	31888	182407	1	d__Bacteria	p_Bacteroidetes/ChlorobiGroup;c_NovelClassA	p_Marinimicrobia (KJ589710)
TMED145	66.9	4.17	39.39	30.5	1.22	1173	37	45399	32920	118319		d__Bacteria;p__Bacteroidetes;c__Flavobacteriia;o__Flavobacteriales;f__Flavobacteriaceae	p_Bacteroidetes;c_Flavobacteriia;o_Flavobacteriales;f_Flavobacteriaceae;
TMED146	66.67	1.85	0	30.7	0.88	941	13	135228	67626	185387		d__Bacteria;p__Proteobacteria;c__Alphaproteobacteria;o__Rickettsiales;f__Pelagibacteraceae
TMED147	66.64	8.82	21.43	34	1.15	1126	87	13551	13246	54352		d__Bacteria;p__Bacteroidetes;c__Flavobacteriia;o__Flavobacteriales	p_Bacteroidetes;c_Flavobacteriia;o_Flavobacteriales;f_Flavobacteriaceae;g_NovelGenusA
TMED148	66.23	5.09	31.82	44.6	1.99	1919	131	15279	15207	146929		d__Bacteria;p__Proteobacteria;c__Gammaproteobacteria	p_Proteobacteria;c_Gammaproteobacteria;o_Cellvibrionales;f_NovelFamilyB
TMED149	66.16	3.6	0	39.7	1.01	961	20	55028	50741	120645		d__Bacteria;p__Verrucomicrobia;c__Opitutae;o__Opitutales	p_Verrucomicrobia;c_Opitutae;o_Opitutales;f_Puniceicoccaceae
TMED150*	65.52	13.79	0	46.1	1.42	1475	6	375574	237156	384135		d__Bacteria;p__Proteobacteria;c__Alphaproteobacteria
TMED151	65.34	1.14	100	55.9	1.63	1442	26	78055	62804	156090		d__Bacteria;p__Planctomycetes;c__Planctomycetia;o__Planctomycetales;f__Planctomycetaceae	p_Planctomycetes;c_Phycisphaerae;o_Phycisphaerales;f_Phycisphaeraceae;g_Phycisphaera
TMED152*	65.14	17.7	0	30.8	1.09	1078	18	64884	60712	87921		d__Bacteria;p__Bacteroidetes;c__Cytophagia	p_Bacteroidetes;c_Cytophagia;o_Cytophagales;f_Amoebophilaceae;
TMED153	64.86	9.64	9.09	32	0.95	961	72	12760	13201	54908		d__Bacteria;p__Proteobacteria;c__Alphaproteobacteria;o__Rickettsiales;f__Pelagibacteraceae	p_Proteobacteria;c_Alphaproteobacteria;o_Pelagibacterales;f_Pelagibacteraceae;g_Pelagibacter
TMED154	64.75	5.98	18.18	47.8	1.75	1707	117	15192	14929	107689	1	d__Bacteria;p__Proteobacteria		f_DeltaproteobacteriaSAR324clade (EF574581)
TMED155	64.63	1.29	100	63.1	1.4	1585	35	57049	40034	154961		d__Bacteria;p__Cyanobacteria;c__Chroococcales;o__Chroococcales;f__Cyanobium	p_Cyanobacteria;o_Synechococcales;f_Synechococcaceae;g_Synechococcus
TMED156	64.61	2.16	0	34.9	1.96	2070	145	13711	13495	48566		d__Bacteria;p__Proteobacteria;c__Betaproteobacteria	p_Proteobacteria;c_Betaproteobacteria;o_NovelOrderA
TMED157	64.6	0.97	100	53.5	1.24	1213	49	34699	25212	99662		d__Bacteria;p__Proteobacteria;c__Gammaproteobacteria;o__Alteromonadales_3;f__Alteromonadaceae	p_Proteobacteria;c_Gammaproteobacteria;o_Cellvibrionales;f_NovelFamilyA
TMED158	64.05	5.41	0	56	2.13	1885	86	24904	24805	75212		d__Bacteria;p__Verrucomicrobia;c__Opitutae;o__Opitutales	p_Verrucomicrobia;c_Opitutae;o_Opitutales;
TMED159	63.84	2.95	44.44	33.1	1.01	1081	37	34081	27330	69277		d__Bacteria;p__Proteobacteria;c__Gammaproteobacteria	p_Proteobacteria;c_Gammaproteobacteria;o_NovelOrderE
TMED160	63.7	7.59	20.45	38.9	1.66	1645	84	24203	19738	90112		d__Bacteria;p__Proteobacteria;c__Alphaproteobacteria;o__Rhodobacterales;f__Rhodobacteraceae
TMED161	63.64	0	0	31	1.22	1103	29	72684	42200	219149		d__Bacteria
TMED162	63.52	9.42	0	49.6	1.9	1963	147	14137	12947	27055		d__Bacteria;p__Proteobacteria;c__Alphaproteobacteria;o__Rhizobiales	p_Proteobacteria;c_Alphaproteobacteria;o_Rhizobiales;f_NovelFamilyA
TMED163°	63.45	12.07	100	52.5	2.34	2160	29	100097	80819	216098		d__Bacteria;p__Proteobacteria;c__Gammaproteobacteria
TMED164	63.34	9.6	6.67	47.3	1.29	1172	55	24439	23374	107385		d__Archaea;p__Euryarchaeota	p_EuryarchaeotaMarineGroupII;
TMED165*	63.13	32.21	9.09	28.7	0.74	812	44	17127	16867	22351		d__Bacteria;p__Proteobacteria;c__Alphaproteobacteria;o__Rickettsiales;f__Pelagibacteraceae	p_Proteobacteria;c_Alphaproteobacteria;o_Pelagibacterales;f_Pelagibacteraceae;g_Pelagibacter
TMED166	63.1	5.95	0	30.1	0.85	850	7	116261	120982	293646		d__Bacteria;p__Proteobacteria;c__Alphaproteobacteria;o__Rickettsiales;f__Pelagibacteraceae	p_Proteobacteria;c_Alphaproteobacteria;o_Pelagibacterales;f_Pelagibacteraceae;g_Pelagibacter
TMED167	62.59	0.66	66.67	52.7	2.61	2627	157	17644	16628	76511		d__Bacteria;p__Proteobacteria;c__Alphaproteobacteria;o__Rhodospirillales;f__Rhodospirillaceae
TMED168	62.48	8.62	0	31.2	1.03	1076	35	56008	29567	175899		d__Bacteria;p__Proteobacteria;c__Alphaproteobacteria;o__Rhizobiales	p_Proteobacteria;c_Alphaproteobacteria;o_Rhizobiales;f_NovelFamilyA
TMED169	62.32	5.71	75	58.4	1.52	1847	97	17225	15682	53087		d__Bacteria;p__Cyanobacteria;c__Chroococcales;o__Chroococcales;f__Cyanobium	p_Cyanobacteria;o_Synechococcales;f_Synechococcaceae;g_Synechococcus
TMED170	62.26	9.81	22.22	30.1	0.73	807	32	21258	22722	43110		d__Bacteria;p__Proteobacteria;c__Alphaproteobacteria;o__Rickettsiales;f__Pelagibacteraceae
TMED171	62.14	0.95	0	35.8	1.2	1120	17	72692	70510	116981		d__Bacteria;p__Bacteroidetes;c__Flavobacteriia;o__Flavobacteriales;f__Flavobacteriaceae
TMED172	62.07	3.45	0	49.6	1.55	1468	7	220480	221923	261381		d__Bacteria;p__Actinobacteria;c__Actinobacteria
TMED173	61.73	0	0	45.6	0.83	738	9	89237	91871	143358		d__Archaea;p__Euryarchaeota
TMED174°	61.66	4.82	100	30.1	0.69	756	24	31144	28891	72351		d__Bacteria;p__Proteobacteria;c__Alphaproteobacteria;o__Rickettsiales
TMED175°	61.51	13.34	32.65	41.5	1.56	1463	112	14042	13922	45435		d__Bacteria;p__Verrucomicrobia;c__Opitutae;o__Opitutales	p_Verrucomicrobia;c_NovelClassA
TMED176	61.21	11.29	76.92	57.8	1.77	1727	64	31885	27626	117925		d__Bacteria;p__Proteobacteria;c__Alphaproteobacteria;o__Rhodospirillales;f__Rhodospirillaceae	p_Proteobacteria;c_Alphaproteobacteria;g_CaPuniceispirillum
TMED177	61.14	2.17	50	60.5	1.35	1493	62	26920	21775	67278		d__Bacteria;p__Cyanobacteria;c__Chroococcales;o__Chroococcales;f__Cyanobium
TMED178	61.13	0	0	37.5	0.89	884	10	99921	89225	159008		d__Bacteria
TMED179	61.03	0	0	32.8	1.04	962	10	101308	103925	194597		d__Bacteria;p__Bacteroidetes;c__Flavobacteriia;o__Flavobacteriales	p_Bacteroidetes;c_Flavobacteriia;o_Flavobacteriales;f_Flavobacteriaceae;g_NovelGenusA
TMED180	60.94	7.14	82.93	43	1.57	1617	105	16300	14969	36396		d__Bacteria;p__Proteobacteria;c__Gammaproteobacteria	p_Proteobacteria;c_Gammaproteobacteria;o_NovelOrderA
TMED181	60.82	2.15	0	52.4	2.49	2074	170	15300	14639	61736	1	d__Bacteria		p_PlanctomycetesPla3 (KF786393)
TMED182	60.59	7.94	15.09	49	2.72	2779	217	12501	12517	51120		d__Bacteria;p__Proteobacteria;c__Gammaproteobacteria	p_Proteobacteria;c_Gammaproteobacteria;o_NovelOrderA
TMED183	60.34	1.72	100	57.6	1.3	1264	16	85273	81244	157143		d__Bacteria;p__Proteobacteria;c__Alphaproteobacteria;o__Rhodospirillales;f__Rhodospirillaceae
TMED184	60.34	8.93	5.56	31.4	0.78	763	21	40319	37350	51031		d__Bacteria;p__Bacteroidetes;c__Flavobacteriia;o__Flavobacteriales;f__Flavobacteriaceae
TMED185	60.33	5.3	86.36	61.4	1.42	1669	69	24591	20645	61580		d__Bacteria;p__Cyanobacteria;c__Chroococcales;o__Chroococcales;f__Cyanobium	p_Cyanobacteria;o_Synechococcales;f_Synechococcaceae;g_Synechococcus
TMED186	60.32	9.25	21.95	32.5	1.47	1531	61	31367	24152	92613		d__Bacteria;p__Proteobacteria;c__Gammaproteobacteria	p_Proteobacteria;c_Gammaproteobacteria;o_NovelOrderE
TMED187	60.31	0.87	0	59.6	1.84	1976	148	12671	12432	65071		d__Bacteria;p__Cyanobacteria;c__Chroococcales;o__Chroococcales;f__Cyanobium	p_Cyanobacteria;o_Synechococcales;f_Synechococcaceae;g_Synechococcus
TMED188	60.31	1.9	55.56	59.4	1.35	1557	64	25802	21136	58682		d__Bacteria;p__Cyanobacteria;c__Chroococcales;o__Chroococcales;f__Cyanobium
TMED189	60.11	1.28	0	34.3	0.64	742	32	25024	20034	47211		d__Bacteria;p__Actinobacteria;c__Actinobacteria	p_Actinobacteria;c_Actinobacteria;o_Acidimicrobiales;f_Acidimicrobiaceae;g_NovelGenusA
TMED190	59.89	0	0	27.8	1.06	968	14	99734	75703	279736	1	d__Bacteria		p_Marinimicrobia (GU940987)
TMED191	59.84	2.15	0	29.7	1	931	19	50372	52485	88968		d__Bacteria;p__Bacteroidetes;c__Flavobacteriia;o__Flavobacteriales	p_Bacteroidetes;c_Flavobacteriia;o_Flavobacteriales;f_NovelFamilyA
TMED192	59.6	4.8	33.33	49.7	1.27	1082	9	128827	140815	284019		d__Archaea;p__Euryarchaeota	p_EuryarchaeotaMarineGroupII;
TMED193°	59.48	14.5	100	34.3	0.48	498	11	47161	43702	121988		d__Bacteria;p__Proteobacteria;c__Gammaproteobacteria
TMED194°	59.34	12.34	33.33	32.3	1.4	1640	27	36261	34668	50556		d__Bacteria;p__Proteobacteria;c__Alphaproteobacteria;o__Rickettsiales	p_Proteobacteria;c_Alphaproteobacteria;o_NovelOrderB
TMED195*	59.34	10.89	0	30.1	0.94	1021	84	19078	16666	109197		d__Bacteria;p__Proteobacteria;c__Alphaproteobacteria;o__Rickettsiales	p_Proteobacteria;c_Alphaproteobacteria;o_Pelagibacterales;f_Pelagibacteraceae;
TMED196	59.2	1.2	0	29.1	0.56	636	32	21047	17394	56849		d__Bacteria;p__Proteobacteria;c__Alphaproteobacteria;o__Rickettsiales;f__Pelagibacteraceae	p_Proteobacteria;c_Alphaproteobacteria;o_Pelagibacterales;f_Pelagibacteraceae;g_Pelagibacter
TMED197	58.82	0.6	0	29.6	0.83	1064	44	21389	18817	118694		d__Bacteria;p__Proteobacteria;c__Alphaproteobacteria;o__Rickettsiales;f__Pelagibacteraceae	p_Proteobacteria;c_Alphaproteobacteria;o_Pelagibacterales;f_Pelagibacteraceae;g_Pelagibacter
TMED198	58.79	0.3	100	34.3	1.14	1094	80	14862	14226	53102		d__Bacteria	p_Bacteroidetes/ChlorobiGroup;c_NovelClassA
TMED199	58.64	4.28	92.31	30.3	1	1062	49	25649	20469	63938		d__Bacteria;p__Proteobacteria;c__Alphaproteobacteria;o__Rhodospirillales;f__Rhodospirillaceae	p_Proteobacteria;c_Alphaproteobacteria;o_NovelOrderA
TMED200	58.62	6.43	0	30.7	0.75	723	31	33010	24176	78487		d__Bacteria;p__Bacteroidetes;c__Flavobacteriia;o__Flavobacteriales;f__Flavobacteriaceae
TMED201	58.49	1.89	0	28	0.81	904	42	25181	19353	59931		d__Bacteria;p__Proteobacteria;c__Alphaproteobacteria;o__Rickettsiales;f__Pelagibacteraceae;g__Candidatus_Pelagibacter-like
TMED202	58.43	6.02	0	31	0.65	781	19	36492	34088	61737		d__Bacteria;p__Proteobacteria;c__Alphaproteobacteria;o__Rickettsiales;f__Pelagibacteraceae	p_Proteobacteria;c_Alphaproteobacteria;o_Pelagibacterales;f_Pelagibacteraceae;g_Pelagibacter
TMED203	58.36	5.42	100	31.3	0.87	977	46	27640	18901	63441		d__Bacteria;p__Proteobacteria;c__Alphaproteobacteria;o__Rickettsiales;f__Pelagibacteraceae	p_Proteobacteria;c_Alphaproteobacteria;o_Pelagibacterales;f_Pelagibacteraceae;g_Pelagibacter
TMED204	58.35	5.68	62.5	39.3	1.28	1212	52	30955	24562	63737		d__Bacteria;p__Bacteroidetes;c__Flavobacteriia;o__Flavobacteriales;f__Flavobacteriaceae	p_Bacteroidetes;c_Flavobacteriia;o_Flavobacteriales;f_Flavobacteriaceae;g_NovelGenusA
TMED205	58.32	5.75	100	63.3	1.28	1395	45	35012	28453	90473		d__Bacteria;p__Cyanobacteria;c__Chroococcales;o__Chroococcales;f__Cyanobium	p_Cyanobacteria;o_Synechococcales;f_Synechococcaceae;g_Synechococcus
TMED206	58.32	7.72	7.69	31.5	1.37	1344	100	14901	13693	55359		d__Bacteria;p__Bacteroidetes;c__Flavobacteriia;o__Flavobacteriales	p_Bacteroidetes;c_Flavobacteriia;o_Flavobacteriales;f_Flavobacteriaceae;g_NovelGenusA
TMED207°	58.11	10.81	10.53	41.6	0.94	906	12	76703	78413	124891		d__Bacteria;p__Verrucomicrobia;c__Opitutae;o__Opitutales
TMED208	57.95	1.93	50	33.1	1.35	1293	74	22608	18302	56008		d__Bacteria;p__Bacteroidetes;c__Flavobacteriia;o__Flavobacteriales;f__Flavobacteriaceae	p_Bacteroidetes;c_Flavobacteriia;o_Flavobacteriales;f_Flavobacteriaceae;g_NovelGenusA
TMED209	57.8	2.69	0	54.1	1.66	1469	30	55148	55367	108912		d__Bacteria;p__Bacteroidetes;c__Flavobacteriia;o__Flavobacteriales	p_Bacteroidetes;c_Flavobacteriia;o_Flavobacteriales;f_Crocinitomicaceae;
TMED210	57.69	7.86	60	32.8	0.74	848	49	17446	15051	41260		d__Bacteria;p__Actinobacteria;c__Actinobacteria	p_Actinobacteria;c_Actinobacteria;o_Acidimicrobiales;f_Acidimicrobiaceae;g_NovelGenusA
TMED211	57.53	0	0	31.1	0.91	987	71	12999	12756	33046		d__Bacteria;p__Proteobacteria;c__Alphaproteobacteria;o__Rickettsiales
TMED212	57.35	6.37	0	34.8	1.23	1155	36	38775	34147	193171		d__Bacteria;p__Bacteroidetes;c__Flavobacteriia;o__Flavobacteriales	p_Bacteroidetes;c_Flavobacteriia;o_Flavobacteriales;f_Flavobacteriaceae;g_NovelGenusA
TMED213	57.28	1.42	60	46	1.26	1250	44	37851	28734	73753		d__Bacteria;p__Proteobacteria;c__Alphaproteobacteria;o__Rhodospirillales;f__Rhodospirillaceae	p_Proteobacteria;c_Alphaproteobacteria;g_CaPuniceispirillum
TMED214	57.01	8.59	0	49.7	3.66	3192	285	12630	12856	83100		d__Bacteria;p__Bacteroidetes;c__Sphingobacteriia;o__Sphingobacteriales	p_Bacteroidetes;c_Saprospiria;o_Saprospirales;
TMED215	56.67	0.8	0	46.8	0.99	891	20	60758	49744	171294		d__Archaea;p__Euryarchaeota
TMED216	56.6	5.66	0	29.7	0.81	840	12	63401	67450	147517		d__Bacteria;p__Proteobacteria;c__Alphaproteobacteria;o__Rickettsiales;f__Pelagibacteraceae
TMED217	56.59	1.1	0	32.5	1.11	986	27	43942	40930	79971		d__Bacteria	p_Bacteroidetes/ChlorobiGroup;c_NovelClassA
TMED218	56.43	0.66	0	38.6	0.96	1004	62	17456	15525	51157	1	d__Bacteria;p__Proteobacteria;c__Gammaproteobacteria;o__Thiotrichales	p_Proteobacteria;c_Gammaproteobacteria;g_CandidatusThioglobus	o_OceanospirillalesZD0405 (HQ673145)
TMED219	56.42	2.3	0	36.4	0.73	725	13	92628	56331	182788		d__Bacteria;p__Proteobacteria;c__Gammaproteobacteria	p_Proteobacteria;c_Gammaproteobacteria;o_NovelOrderE
TMED220	56.13	8.82	6.67	28.6	0.97	946	34	30355	28557	72679		d__Bacteria;p__Bacteroidetes;c__Flavobacteriia;o__Flavobacteriales	p_Bacteroidetes;c_Flavobacteriia;o_Flavobacteriales;f_Flavobacteriaceae;g_NovelGenusA
TMED221	56.03	9.48	0	35.6	0.99	1022	69	13941	14379	46423		d__Bacteria
TMED222	55.78	3.22	75	33.7	0.89	969	58	18024	15430	45638		d__Bacteria;p__Proteobacteria;c__Gammaproteobacteria	p_Proteobacteria;c_Gammaproteobacteria;o_NovelOrderE
TMED223	55.69	3.98	0	47.6	1.72	1856	121	14739	14201	46044	1	d__Bacteria;p__Cyanobacteria;c__Chroococcales;o__Chroococcales;f__Cyanobium	p_Cyanobacteria;o_Prochlorales;f_Prochlorococcaceae;g_Prochlorococcus	g_Mitochondria (ATZY01000070)*
TMED224	55.56	1.28	50	51.2	1.44	1432	14	136946	102535	343066		d__Bacteria;p__Actinobacteria;c__Actinobacteria	p_Actinobacteria;c_Actinobacteria;o_Acidimicrobiales;f_Acidimicrobiaceae;
TMED225	55.46	2.47	7.69	31.3	0.86	927	35	34018	24537	76832		d__Bacteria;p__Proteobacteria;c__Gammaproteobacteria	p_Proteobacteria;c_Gammaproteobacteria;o_NovelOrderE
TMED226	55.33	0	0	32.9	0.78	832	23	46992	33722	78922		d__Bacteria;p__Proteobacteria;c__Gammaproteobacteria	p_Proteobacteria;c_Gammaproteobacteria;o_NovelOrderE
TMED227°	55.17	10.34	15	36.8	1.06	1127	32	48571	33106	164400		d__Bacteria;p__Proteobacteria;c__Alphaproteobacteria;o__Rhizobiales	p_Proteobacteria;c_Alphaproteobacteria;o_Rhizobiales;f_NovelFamilyA
TMED228	55.13	4.3	36.36	33.8	1.76	1889	129	14420	13659	50573		d__Bacteria;p__Bacteroidetes;c__Flavobacteriia;o__Flavobacteriales
TMED229	55.13	0.54	100	57.7	1.35	1439	30	55680	45093	160695		d__Bacteria;p__Cyanobacteria;c__Chroococcales;o__Chroococcales;f__Cyanobium
TMED230	55.12	0.99	100	30.7	0.84	867	11	169098	76796	180308	1	d__Bacteria;p__Chloroflexi;c__Dehalococcoidetes	p_NovelDivisionA;	p_ChloroflexiSAR202 (AY907820)*
TMED231	54.99	1.14	100	66	2.06	1701	89	28399	23166	100296	1	d__Bacteria;p__Planctomycetes;c__Planctomycetia;o__Planctomycetales;f__Planctomycetaceae		f_PhycisphaeraceaeCL500-3 (DQ071098)
TMED232°	54.89	15.09	43.75	29	0.52	616	17	33693	30749	64887		d__Bacteria;p__Proteobacteria;c__Alphaproteobacteria;o__Rickettsiales;f__Pelagibacteraceae;g__Candidatus_Pelagibacter-like
TMED233*	54.72	14.92	0	27.5	0.72	769	25	28204	28948	72525		d__Bacteria;p__Proteobacteria;c__Alphaproteobacteria;o__Rickettsiales;f__Pelagibacteraceae
TMED234	54.36	3.07	28.57	34.1	0.87	969	39	29111	22344	83185		d__Bacteria;p__Proteobacteria;c__Gammaproteobacteria	p_Proteobacteria;c_Gammaproteobacteria;o_NovelOrderE
TMED235	54.31	8.46	0	32.4	1.7	1619	112	16276	15216	88870		d__Bacteria;p__Bacteroidetes;c__Flavobacteriia;o__Flavobacteriales
TMED236°	54.3	11.8	17.24	35.4	1.32	1345	71	20693	18593	68958		d__Bacteria;p__Proteobacteria;c__Gammaproteobacteria	p_Proteobacteria;c_Gammaproteobacteria;o_NovelOrderE
TMED237	54.22	2.52	0	28.1	0.81	843	26	31159	31122	49402		d__Bacteria;p__Proteobacteria;c__Alphaproteobacteria;o__Rickettsiales	p_Proteobacteria;c_Alphaproteobacteria;o_Pelagibacterales;f_Pelagibacteraceae;
TMED238°	53.73	12.23	30.43	29.3	1.17	1150	88	13478	13328	18612		d__Bacteria;p__Bacteroidetes;c__Flavobacteriia;o__Flavobacteriales;f__Flavobacteriaceae	p_Bacteroidetes;c_Flavobacteriia;o_Flavobacteriales;f_Flavobacteriaceae;g_NovelGenusA
TMED239	53.67	9.04	8.33	29.4	0.87	937	54	16306	16202	24652		d__Bacteria;p__Proteobacteria;c__Alphaproteobacteria;o__Rickettsiales;f__Pelagibacteraceae	p_Proteobacteria;c_Alphaproteobacteria;o_Pelagibacterales;f_Pelagibacteraceae;g_Pelagibacter
TMED240	53.65	2.35	0	50.5	3.79	2900	57	68948	66451	169231		d__Bacteria;p__Planctomycetes;c__Planctomycetia;o__Planctomycetales;f__Planctomycetaceae
TMED241°	53.55	17.26	86.05	62	1.88	2119	100	22948	18833	74936		d__Bacteria;p__Cyanobacteria;c__Chroococcales;o__Chroococcales;f__Cyanobium
TMED242	53.44	3.86	81.25	32.5	0.8	875	36	27763	22247	58643		d__Bacteria;p__Proteobacteria;c__Gammaproteobacteria	p_Proteobacteria;c_Gammaproteobacteria;o_NovelOrderE
TMED243	53.05	5.8	0	50.9	2.27	2370	36	62018	63072	216865		d__Bacteria;p__Proteobacteria;c__Gammaproteobacteria	p_Proteobacteria;c_Gammaproteobacteria;o_NovelOrderA
TMED244	52.99	1.36	100	33.9	0.58	661	24	37287	24325	128697		d__Bacteria;p__Actinobacteria;c__Actinobacteria	p_Actinobacteria;c_Actinobacteria;o_Acidimicrobiales;f_Acidimicrobiaceae;g_NovelGenusA
TMED245°	52.84	26.71	87.5	59.2	1.73	1701	98	18770	17643	58296		d__Bacteria;p__Proteobacteria;c__Alphaproteobacteria;o__Rhodospirillales;f__Rhodospirillaceae	p_Proteobacteria;c_Alphaproteobacteria;g_CaPuniceispirillum
TMED247*	52.83	11.32	0	31.3	0.79	905	4	134297	142066	230772		d__Bacteria;p__Proteobacteria;c__Alphaproteobacteria;o__Rickettsiales;f__Pelagibacteraceae
TMED246	52.83	7.55	0	28.4	0.57	593	10	75033	78803	135183		d__Bacteria;p__Proteobacteria;c__Alphaproteobacteria;o__Rickettsiales;f__Pelagibacteraceae
TMED248	52.67	1.6	100	39.7	1.12	992	50	30075	22485	97714		d__Archaea;p__Euryarchaeota	p_EuryarchaeotaMarineGroupII;
TMED249	52.59	0	0	47.2	1.13	1124	18	97434	62756	168868		d__Bacteria;p__Proteobacteria;c__Alphaproteobacteria;o__Rhizobiales
TMED250	52.45	3.3	0	34.2	0.88	827	17	51011	51987	80263		d__Bacteria
TMED251	52.38	3.3	100	28.8	0.75	793	30	25972	24907	32833		d__Bacteria;p__Proteobacteria;c__Alphaproteobacteria;o__Rickettsiales
TMED252	52.37	2.4	0	59.3	1.25	1049	70	19021	17879	45627		d__Archaea;p__Euryarchaeota	p_EuryarchaeotaMarineGroupII;
TMED253°	52.36	12.05	28.57	30.5	0.87	919	59	14672	14741	22302		d__Bacteria;p__Proteobacteria;c__Alphaproteobacteria;o__Rickettsiales;f__Pelagibacteraceae	p_Proteobacteria;c_Alphaproteobacteria;o_Pelagibacterales;f_Pelagibacteraceae;g_Pelagibacter
TMED254*	52.15	18.68	0	28.5	0.84	957	57	15015	14742	25433		d__Bacteria;p__Proteobacteria;c__Alphaproteobacteria;o__Rickettsiales
TMED255	52.13	1.2	0	45.4	2.16	1939	100	26860	21644	202645		d__Archaea;p__Euryarchaeota	p_EuryarchaeotaMarineGroupII;
TMED256	52.05	3.91	63.64	55.1	2.75	2878	170	17340	16189	49619		d__Bacteria;p__Proteobacteria;c__Alphaproteobacteria;o__Rhodospirillales;f__Rhodospirillaceae
TMED257	51.99	0.76	66.67	30.6	0.75	819	12	71542	62324	138077		d__Bacteria;p__Proteobacteria;c__Gammaproteobacteria	p_Proteobacteria;c_Gammaproteobacteria;o_NovelOrderC
TMED258	51.97	1.61	0	31.5	0.55	629	38	15833	14495	50234		d__Bacteria;p__Proteobacteria;c__Alphaproteobacteria;o__Rickettsiales	p_Proteobacteria;c_Alphaproteobacteria;o_Pelagibacterales;f_Pelagibacteraceae;
TMED259	51.95	0	0	34	0.75	807	58	15710	12861	32994		d__Bacteria;p__Proteobacteria;c__Alphaproteobacteria;o__Rickettsiales	p_Proteobacteria;c_Alphaproteobacteria;o_Pelagibacterales;f_Pelagibacteraceae;
TMED260	51.77	1.05	83.33	52.2	1.88	1782	35	90483	53650	147534		d__Bacteria;p__Proteobacteria;c__Gammaproteobacteria	p_Proteobacteria;c_Gammaproteobacteria;o_NovelOrderA
TMED261	51.72	6.9	0	46	2.2	2218	152	15029	14447	45327		d__Bacteria;p__Proteobacteria
TMED262	51.72	0	0	31.2	0.92	865	17	74486	54204	166394		d__Bacteria;p__Bacteroidetes;c__Cytophagia;o__Cytophagales;f__Flammeovirgaceae
TMED263°	51.61	10.84	30	30.4	0.85	964	68	12626	12521	31093		d__Bacteria;p__Proteobacteria;c__Alphaproteobacteria;o__Rickettsiales;f__Pelagibacteraceae	p_Proteobacteria;c_Alphaproteobacteria;o_Pelagibacterales;f_Pelagibacteraceae;g_Pelagibacter
TMED264	51.52	4.4	0	33.1	1.72	1692	111	17111	15530	56119		d__Bacteria
TMED265	51.47	0.66	100	37.2	1.12	1088	13	101730	86439	134547		d__Bacteria;p__Bacteroidetes;c__Flavobacteriia;o__Flavobacteriales;f__Flavobacteriaceae
TMED266	51.32	2.03	0	48.9	1.08	1001	28	41658	38590	89393		d__Bacteria	p_Kiritimatiellaeota;c_Kiritimatiellae;o_Kiritimatiellales;f_Kiritimatiellaceae
TMED267°	50.94	15.4	54.41	29.5	0.77	845	46	16600	16761	23752		d__Bacteria;p__Proteobacteria;c__Alphaproteobacteria;o__Rickettsiales;f__Pelagibacteraceae;g__Candidatus_Pelagibacter-like
TMED268	50.94	0	0	28.3	0.42	470	31	13338	13485	32632		d__Bacteria;p__Proteobacteria;c__Alphaproteobacteria;o__Rickettsiales;f__Pelagibacteraceae
TMED269	50.88	1.75	0	36.8	0.63	651	25	25723	25096	36740		d__Bacteria;p__Proteobacteria;c__Alphaproteobacteria;o__Rickettsiales
TMED270°	50.86	20.69	100	51.2	1.25	1248	23	93356	54318	170414	1	d__Bacteria;p__Actinobacteria;c__Actinobacteria		o_AcidimicrobialesSva0996 (AF382139)
TMED271	50.63	1.1	100	37.3	0.94	977	33	31645	28367	76829		d__Bacteria;p__Proteobacteria;c__Alphaproteobacteria;o__Rhodobacterales	p_Proteobacteria;c_Alphaproteobacteria;o_Rhodobacterales;
TMED272	50.6	9.14	0	35.2	0.65	715	10	62351	64709	131559		d__Bacteria;p__Proteobacteria;c__Alphaproteobacteria;o__Rickettsiales;f__Pelagibacteraceae	p_Proteobacteria;c_Alphaproteobacteria;o_Pelagibacterales;f_Pelagibacteraceae;g_Pelagibacter
TMED273	50.6	6.02	0	28.1	1.31	1431	33	41541	39754	61763		d__Bacteria;p__Proteobacteria;c__Alphaproteobacteria;o__Rickettsiales;f__Pelagibacteraceae	p_Proteobacteria;c_Alphaproteobacteria;o_Pelagibacterales;f_Pelagibacteraceae;g_Pelagibacter
TMED274	50.55	1.1	100	31.7	0.53	556	8	134331	66271	149875		d__Bacteria	p_Bacteroidetes/ChlorobiGroup;c_NovelClassA
TMED275	50.49	0.11	100	30	0.44	512	28	19405	15820	44043		d__Bacteria;p__Proteobacteria;c__Alphaproteobacteria;o__Rickettsiales;f__Pelagibacteraceae	p_Proteobacteria;c_Alphaproteobacteria;o_Pelagibacterales;f_Pelagibacteraceae;g_Pelagibacter
TMED276	50.41	0.02	0	51.8	1.67	1589	48	45038	34710	107482		d__Bacteria;p__Proteobacteria;c__Gammaproteobacteria;o__Oceanospirillales;f__Oceanospirillaceae
TMED277	50.2	6.5	0	34.5	1.08	1194	90	11199	11965	58755		d__Bacteria
TMED278	50.19	2.44	41.67	31.3	0.92	982	34	36762	27151	89484		d__Bacteria;p__Proteobacteria;c__Gammaproteobacteria	p_Proteobacteria;c_Gammaproteobacteria;o_NovelOrderE
TMED279	50.13	0.8	0	43.4	1	879	50	22660	19946	74473		d__Archaea;p__Euryarchaeota	p_EuryarchaeotaMarineGroupII;
TMED280	50.13	2.4	66.67	37.8	0.77	704	30	31523	25785	81438		d__Archaea;p__Euryarchaeota
TMED281	50.13	5.77	0	36.6	0.92	940	43	19347	21364	55914		d__Bacteria;p__Proteobacteria;c__Gammaproteobacteria;o__Legionellales	p_Proteobacteria;c_Gammaproteobacteria;o_NovelOrderF
TMED282	50.1	2.64	33.33	43.7	1.51	1532	78	25573	19375	72515		d__Bacteria;p__Proteobacteria;c__Gammaproteobacteria	p_Proteobacteria;c_Gammaproteobacteria;o_Methylococcales;f_Methylococcaceae;g_NovelGenusB
TMED283	50.05	0	0	51.4	2.96	2185	47	130887	62894	316922	1	d__Bacteria;p__Planctomycetes;c__Planctomycetia;o__Planctomycetales;f__Planctomycetaceae		g_Rhodopirellula (GQ346796)
TMED284	50	0	0	40.5	0.78	681	16	43632	48814	76096		d__Bacteria;p__Bacteroidetes
TMED285°	50	15.52	90.91	37.2	0.71	705	9	76935	78404	122001		d__Bacteria;p__Proteobacteria;c__Gammaproteobacteria;o__Thiotrichales
TMED286	50	15.54	58.33	28.8	0.78	833	64	12049	12228	33851		d__Bacteria;p__Proteobacteria;c__Alphaproteobacteria;o__Rickettsiales;f__Pelagibacteraceae	p_Proteobacteria;c_Alphaproteobacteria;o_Pelagibacterales;f_Pelagibacteraceae;g_Pelagibacter
TMED287	50	5.66	0	31.5	0.84	906	27	29576	31175	71721		d__Bacteria;p__Proteobacteria;c__Alphaproteobacteria;o__Rickettsiales;f__Pelagibacteraceae
TMED288°	50	10.34	12.5	27.3	0.94	850	12	99936	78100	231889		d__Bacteria;p__Bacteroidetes;c__Flavobacteriia;o__Flavobacteriales
TMED289*	50	17.92	0	30.2	1.59	1556	29	57044	54776	86088		d__Bacteria;p__Proteobacteria;c__Alphaproteobacteria;o__Rickettsiales
TMED290*	50	20.69	0	34.1	1.66	1548	11	134425	151000	313474		d__Bacteria;p__Bacteroidetes;c__Cytophagia;o__Cytophagales;f__Flammeovirgaceae
